# Supplementary material for: Effects of a WhatsApp-Assisted Health Educational Intervention for Cardiac Rehabilitation: A Randomized Controlled Clinical Trial Protocol
Source: MDPI journal article supplement (doi:10.3390/mps7020035), 2024-04-19
Supplement: s1 [file s1]

**Supplementary Materials. Cardiovascular risk factors knowledge questionnaire.**

**Unique Participant Code**

|  |  |  |
|--|--|--|
|  |  |  |
|--|--|--|

**Questionnaire:**

**Evaluation of the knowledge about healthy habits in people attending a cardiac rehabilitation program**

**Name:**\_\_\_\_\_ **Telephone Number:**\_\_\_\_\_

Rate from 1 to 5 the knowledge you think you have about healthy habits, considering that 1 is no knowledge and 5 is extensive knowledge.

**Hypertension**

|    | <u>Item</u>                                                                                                                                                  | <u>1</u><br><u>No</u><br><u>Knowledge</u> | <u>2</u> | <u>3</u> | <u>4</u> | <u>5</u><br><u>Extensive</u><br><u>Knowledge</u> |
|----|--------------------------------------------------------------------------------------------------------------------------------------------------------------|-------------------------------------------|----------|----------|----------|--------------------------------------------------|
| H1 | I am aware about the damage that hypertension can cause to different organs like the brain, eyes, kidneys, and heart.                                        |                                           |          |          |          |                                                  |
| H2 | I am aware of the side effects (undesirable effects) that may occur when taking the medications prescribed by the doctor for the management of hypertension. |                                           |          |          |          |                                                  |
| H3 | I know the foods that can increase my blood pressure due to their high salt concentration.                                                                   |                                           |          |          |          |                                                  |
| H4 | I recognize the benefits of regular physical exercise on my blood pressure.                                                                                  |                                           |          |          |          |                                                  |

### Diabetes Mellitus

|     | Item                                                                                                                                                     | <u>1</u><br><u>No</u><br><u>Knowledge</u> | <u>2</u> | <u>3</u> | <u>4</u> | <u>5</u><br><u>Extensive</u><br><u>Knowledge</u> |
|-----|----------------------------------------------------------------------------------------------------------------------------------------------------------|-------------------------------------------|----------|----------|----------|--------------------------------------------------|
| DM1 | I have knowledge about the damage that type 2 diabetes mellitus can cause to different organs like the brain, eyes, kidneys, heart, and legs.            |                                           |          |          |          |                                                  |
| DM2 | I recognize the side effects that can be felt with the medications taken for the management of diabetes.                                                 |                                           |          |          |          |                                                  |
| DM3 | I am aware of the foods that can increase daily blood sugar levels (glycemia), as well as the ideal ranges in which I should maintain my daily glycemia. |                                           |          |          |          |                                                  |
| DM4 | I know what glycated hemoglobin is and the values in which it is considered adequate.                                                                    |                                           |          |          |          |                                                  |
| DM5 | I identify the benefits that regular physical exercise can generate for blood sugar control.                                                             |                                           |          |          |          |                                                  |

### Smoking

|    | Item                                                                                                                                                 | <u>1</u><br><u>No</u><br><u>Knowledge</u> | <u>2</u> | <u>3</u> | <u>4</u> | <u>5</u><br><u>Extensive</u><br><u>Knowledge</u> |
|----|------------------------------------------------------------------------------------------------------------------------------------------------------|-------------------------------------------|----------|----------|----------|--------------------------------------------------|
| S1 | I have knowledge about the damage that tobacco consumption can cause to different organs like eyes, teeth, heart, and lungs.                         |                                           |          |          |          | X                                                |
| S2 | I identify different strategies that exist to help reduce tobacco consumption, such as: nicotine gum, nicotine patches, and therapy with psychology. |                                           |          |          |          |                                                  |
| S3 | I recognize the types of foods and the proportion they should have in a healthy plate.                                                               |                                           |          |          |          |                                                  |
| S4 | I understand the role of physical exercise in effectively aiding the control and treatment of smoking-related health issues.                         |                                           |          |          |          |                                                  |

### Dyslipidemia

|    | Item                                                                                                                                                                                                                                                                | <u>1</u><br>No<br>Knowledge | <u>2</u> | <u>3</u> | <u>4</u> | <u>5</u><br>Extensive<br>Knowledge |
|----|---------------------------------------------------------------------------------------------------------------------------------------------------------------------------------------------------------------------------------------------------------------------|-----------------------------|----------|----------|----------|------------------------------------|
| D1 | I possess a clear understanding of dyslipidemia, including the distinctions between high-density lipoprotein (HDL) or 'good' cholesterol and low-density lipoprotein (LDL) or 'bad' cholesterol.                                                                    |                             |          |          |          |                                    |
| D2 | I recognize the side effects that can be felt with the medications prescribed by the doctor for the control of high cholesterol.                                                                                                                                    |                             |          |          |          |                                    |
| D3 | I am aware of the foods that should not be consumed and those that should be to prevent high cholesterol.                                                                                                                                                           |                             |          |          |          |                                    |
| D4 | I understand the beneficial impact of physical exercise in regulating cholesterol levels, specifically by increasing high-density lipoprotein (HDL, the 'good' cholesterol) and decreasing low-density lipoprotein (LDL, the 'bad' cholesterol) and triglycerides." |                             |          |          |          |                                    |
| D5 | I am able to read and understand the nutritional label of the product I buy in the grocery store.                                                                                                                                                                   |                             |          |          |          |                                    |

#### Score calculation by dimension:

Hypertension Knowledge: average of H1, H2, H3, H4

Diabetes Mellitus Knowledge: average of DM1, DM2, DM3, DM4 and DM5

Smoking Knowledge: average of S1, S2, S3 and S4

Dyslipidemia Knowledge: D1, D2, D3, D4, D5

Pathophysiology Knowledge: average of H1, DM1, S1, D1,

Pharmacology knowledge: average of H2, DM2, S2, D2

Nutritional Knowledge: average of H3, DM3, DM4, S3, D3, D5

Physical activity knowledge: average of H4, DM5, S4, D4
